# Supplementary material for: ‘Fly to a Safer North’: Distributional Shifts of the Orchid Ophrys insectifera L. Due to Climate Change
Source: MDPI journal article supplement (doi:10.3390/biology11040497), 2022-03-24
Supplement: s1 [file s1]

**Table S1.** Predictors that did not show any collinearity issues and were included in the analysis.

| a/a | Variable code | Variable explanation                                                                                    |
|-----|---------------|---------------------------------------------------------------------------------------------------------|
| 1   | bio 2         | Mean Diurnal Range (mean of monthly (max temp - min temp))                                              |
| 2   | bio 4         | Temperature Seasonality (standard deviation x 100)                                                      |
| 3   | bio 15        | Precipitation Seasonality (Coefficient of Variation)                                                    |
| 4   | bio 19        | Precipitation of Coldest Quarter                                                                        |
| 5   | aridityIndT   | Thornthwaite aridity index: index of the degree of water deficit below water need                       |
| 6   | mCByT10       | Count of the number of months with Tmean > 10oC                                                         |
| 7   | PETDQ         | Mean monthly potential evapotranspiration of driest quarter                                             |
| 8   | PETWQ         | Mean monthly potential evapotranspiration of wettest quarter                                            |
| 9   | elev          | Elevation data                                                                                          |
| 10  | slope         | Slope (based on elevation data)                                                                         |
| 11  | aspect        | Aspect (based on elevation data)                                                                        |
| 12  | HLI           | Heat Load Index                                                                                         |
| 13  | TPI           | Topographic Position Index                                                                              |
| 14  | bdod          | Mean bulk density of the fine earth fraction at a depth of 0-5cm                                        |
| 15  | cfvo          | Mean volumetric fraction of coarse fragments (>2mm) at a depth of 0-5cm                                 |
| 16  | clay          | Mean proportion of clay particles (<0.002mm) in the fine earth fraction at a depth of 0-5cm             |
| 17  | nitrogen      | Mean total nitrogen (N) at a depth of 0-5cm                                                             |
| 18  | sand          | Mean proportion of sand particles (>0.05mm) in the fine earth fraction at a depth of 0-5cm              |
| 19  | silt          | Mean proportion of silt particles (≥0.002mm and ≤0.05mm) in the fine earth fraction at a depth of 0-5cm |
| 20  | soc           | Mean soil organic carbon content in the fine earth fraction at a depth of 0-5cm                         |

**Table S2.** Discrimination and calibration metrics for each one of the separate models (RF: Random Forest; BRT: Boosted Regression Trees; BART: Bayesian Additive Regression Trees; MaxEnt: Maximum Entropy), and for both occurrence data thinning procedures (EnvThin: environmental thinning; GeoThin: geographical thinning). ‘Combined’ refers to the mean of all models and thinning procedures. TSS: True Skill Statistic; AUC: Area under Curve; PR AUC: Area under Precision-Recall Curve; Kappa: Cohen’s Kappa; CBI: Continuous Boyce Index; Sor: Sørensen’s Index; Brier: Brier Score.

| Thinning | Algorithm | TSS          | AUC          | PR AUC       | Kappa        | CBI          | Sor          | Brier        |
|----------|-----------|--------------|--------------|--------------|--------------|--------------|--------------|--------------|
| EnvThin  | RF        | 0.98         | 1.00         | 1.00         | 0.86         | 0.99         | 0.78         | 0.01         |
|          | BRT       | 0.98         | 0.99         | 1.00         | 0.95         | 0.99         | 0.80         | 0.01         |
|          | BART      | 0.60         | 0.88         | 0.89         | 0.44         | 1.00         | 0.80         | 0.14         |
|          | MaxEnt    | 0.40         | 0.70         | 0.16         | 0.07         | 0.97         | 0.80         | 0.06         |
|          | Mean      | <b>0.74</b>  | <b>0.89</b>  | <b>0.76</b>  | <b>0.58</b>  | <b>0.99</b>  | <b>0.80</b>  | <b>0.05</b>  |
|          | St. Dev.  | 0.29         | 0.14         | 0.40         | 0.41         | 0.01         | 0.01         | 0.06         |
| GeoThin  | RF        | 0.98         | 0.99         | 1.00         | 0.88         | 1.00         | 0.77         | 0.01         |
|          | BRT       | 0.93         | 0.99         | 0.99         | 0.85         | 1.00         | 0.80         | 0.03         |
|          | BART      | 0.66         | 0.90         | 0.90         | 0.55         | 1.00         | 0.80         | 0.12         |
|          | MaxEnt    | 0.46         | 0.70         | 0.32         | 0.18         | 1.00         | 0.80         | 0.09         |
|          | Mean      | <b>0.76</b>  | <b>0.90</b>  | <b>0.80</b>  | <b>0.61</b>  | <b>1.00</b>  | <b>0.79</b>  | <b>0.07</b>  |
|          | SD        | 0.24         | 0.14         | 0.32         | 0.32         | 0.00         | 0.02         | 0.05         |
| Combined | Mean      | <b>0.747</b> | <b>0.895</b> | <b>0.782</b> | <b>0.598</b> | <b>0.994</b> | <b>0.794</b> | <b>0.059</b> |
|          | SD        | 0.232        | 0.120        | 0.317        | 0.318        | 0.009        | 0.011        | 0.049        |

**Table S3.** Evaluation metrics for the five selected methods for each ensemble model, and both occurrence data thinning procedures (EnvThin: environmental thinning; GeoThin: geographical thinning). ‘Combined’ refers to the mean of both ensembles. Mean-P: mean of probabilities; Median-P: median of probabilities; wMean-P: weighted mean of probabilities; Com-Av: committee averaging of binary predictions; PCA: estimate of the PCA-weighted ensemble.

| Thinning | Method   | Sorensen     | Brier        | CBI          | TSS          | AUC          |
|----------|----------|--------------|--------------|--------------|--------------|--------------|
| EnvEns   | Mean-P   | 0.800        | 0.000        | 0.999        | 0.969        | 0.998        |
|          | Median-P | 0.793        | 0.000        | 0.992        | 0.979        | 0.997        |
|          | wMean-P  | 0.800        | 0.000        | 1.000        | 0.980        | 0.999        |
|          | Com-Av   | 0.674        | 0.000        | 0.897        | 0.966        | 0.995        |
|          | PCA      | 0.800        | 0.000        | 0.998        | 0.963        | 0.997        |
|          | Mean     | <b>0.773</b> | <b>0.000</b> | <b>0.977</b> | <b>0.971</b> | <b>0.997</b> |
|          | StDev    | 0.056        | 0.000        | 0.045        | 0.008        | 0.001        |
| GeoEns   | Mean-P   | 0.800        | 0.000        | 1.000        | 0.910        | 0.991        |
|          | Median-P | 0.799        | 0.000        | 0.999        | 0.930        | 0.993        |
|          | wMean-P  | 0.800        | 0.000        | 0.999        | 0.929        | 0.993        |
|          | Com-Av   | 0.677        | 0.000        | 0.897        | 0.940        | 0.988        |
|          | PCA      | 0.800        | 0.000        | 1.000        | 0.907        | 0.991        |
|          | Mean     | <b>0.775</b> | <b>0.000</b> | <b>0.979</b> | <b>0.923</b> | <b>0.991</b> |
|          | StDev    | 0.055        | 0.000        | 0.046        | 0.014        | 0.002        |
| Combined | Mean     | <b>0.774</b> | <b>0.000</b> | <b>0.978</b> | <b>0.947</b> | <b>0.994</b> |
|          | StDev    | 0.052        | 0.000        | 0.043        | 0.028        | 0.003        |

**Table S4.** Five first most important variables for each of the separate models (RF: Random Forest; BRT: Boosted Regression Trees; BART: Bayesian Additive Regression Trees; MaxEnt: Maximum Entropy), and for both occurrence data thinning procedures (EnvThin: environmental thinning; GeoThin: geographical thinning). The variable importance values are scaled in a range of (0, 1), to be comparable. Variable codes (alphabetical order): aridityIndT – Thornthwaite aridity index; bio 4 – temperature seasonality (Standard Deviation x 100); bio 15 – precipitation seasonality (coefficient of variation); bio 19 – precipitation of coldest quarter; elev – elevation; PETDQ - Mean monthly potential evapotranspiration of driest quarter; PETWQ - Mean monthly potential evapotranspiration of wettest quarter.

| Thinning | Algorithm | Variable code | Variable Importance<br>(rescaled) |
|----------|-----------|---------------|-----------------------------------|
| EnvThin  | RF        | bio 4         | 1.000                             |
|          |           | elev          | 0.176                             |
|          |           | sand          | 0.165                             |
|          |           | aridityIndT   | 0.056                             |
|          |           | bio 19        | 0.011                             |
|          | BRT       | bio 4         | 1.000                             |
|          |           | aridityIndT   | 0.190                             |
|          |           | PETDQ         | 0.062                             |
|          |           | elev          | 0.058                             |
|          |           | TPI           | 0.057                             |
|          | BART      | aridityIndT   | 1.000                             |
|          |           | bio 4         | 0.901                             |
|          |           | PETDQ         | 0.895                             |
|          |           | PETWQ         | 0.665                             |
|          |           | elev          | 0.535                             |
| GeoThin  | RF        | bio 4         | 1.000                             |
|          |           | bio 15        | 0.392                             |
|          |           | bio 19        | 0.236                             |
|          |           | sand          | 0.162                             |
|          |           | PETDQ         | 0.146                             |
|          | BRT       | bio 4         | 1.000                             |
|          |           | elev          | 0.327                             |
|          |           | aridityIndT   | 0.218                             |
|          |           | bio 15        | 0.138                             |
|          |           | sand          | 0.096                             |
|          | BART      | bio 4         | 1.000                             |
|          |           | aridityIndT   | 0.744                             |
|          |           | elev          | 0.454                             |
|          |           | PETDQ         | 0.439                             |
|          |           | PETWQ         | 0.415                             |

**Table S5.** Percentages of area loss, gain, overall area change and current occurrences lost for future projections of *Ophrys insectifera* of the EnvThin ensemble. For the future, 2 time slices, 2070 (2061-2080) and 2090 (2081-2100), are presented for all selected GCMs (BC: BCC-CSM2-MR, MI: MIROC-ES2L, MR: MRI-ESM2-0) and two SSPs (SSP2-4.5, SSP3-7.0).

| Thinning | Time slice | Transition          | GCM         | Area Loss (%) | Area Gain (%) | Overall Change (%) | Current occurrences lost (%) |
|----------|------------|---------------------|-------------|---------------|---------------|--------------------|------------------------------|
| EnvThin  | 2070       | Present to SSP2 4.5 | BC          | 27.75         | 20.02         | -7.73              | 16.20                        |
|          |            |                     | MI          | 16.83         | 24.08         | 7.26               | 8.16                         |
|          |            |                     | MR          | 35.06         | 14.49         | -20.57             | 22.03                        |
|          |            |                     | <b>Mean</b> | <b>26.55</b>  | <b>19.53</b>  | <b>-7.01</b>       | <b>15.46</b>                 |
|          |            | Present to SSP3 7.0 | BC          | 45.3          | 21.55         | -23.75             | 31.19                        |
|          |            |                     | MI          | 19.94         | 22.74         | 2.79               | 12.43                        |
|          |            |                     | MR          | 30.36         | 16.02         | -14.34             | 18.65                        |
|          |            |                     | <b>Mean</b> | <b>31.87</b>  | <b>20.10</b>  | <b>-11.77</b>      | <b>20.75</b>                 |
|          | 2090       | Present to SSP2 4.5 | BC          | 42.50         | 18.61         | -23.89             | 29.13                        |
|          |            |                     | MI          | 22.98         | 25.01         | 2.03               | 14.10                        |
|          |            |                     | MR          | 24.27         | 14.89         | -9.38              | 12.32                        |
|          |            |                     | <b>Mean</b> | <b>29.92</b>  | <b>19.50</b>  | <b>-10.41</b>      | <b>18.52</b>                 |
|          |            | Present to SSP3 7.0 | BC          | 66.77         | 27.30         | -39.47             | 56.83                        |
|          |            |                     | MI          | 27.20         | 21.33         | -5.88              | 17.31                        |
|          |            |                     | MR          | 23.46         | 15.73         | -7.73              | 11.93                        |
|          |            |                     | <b>Mean</b> | <b>39.14</b>  | <b>21.45</b>  | <b>-17.69</b>      | <b>28.69</b>                 |

**Table S6.** Percentages of area loss, gain, overall area change and current occurrences lost for future projections of *Ophrys insectifera* of the GeoThin ensemble. For the future, 2 time slices, 2070 (2061-2080) and 2090 (2081-2100), are presented for all selected GCMs (BC: BCC-CSM2-MR, MI: MIROC-ES2L, MR: MRI-ESM2-0) and all SSPs (SSP1-2.6, SSP2-4.5, SSP3-7.0 and SSP5-8.5).

| Thinning | Time slice | Transition             | GCM         | Area Loss<br>(%) | Area Gain<br>(%) | Overall Change<br>(%) | Current occurrences<br>lost (%) |
|----------|------------|------------------------|-------------|------------------|------------------|-----------------------|---------------------------------|
| GeoThin  | 2070       | Present to<br>SSP1 2.6 | BC          | 27.43            | 17.50            | -9.93                 | 21.41                           |
|          |            |                        | MI          | 24.51            | 25.60            | 1.09                  | 20.90                           |
|          |            |                        | MR          | 56.90            | 19.30            | -37.60                | 50.38                           |
|          |            |                        | <b>Mean</b> | <b>36.28</b>     | <b>20.80</b>     | <b>-15.48</b>         | <b>30.90</b>                    |
|          |            | Present to<br>SSP2 4.5 | BC          | 43.70            | 19.60            | -24.10                | 37.74                           |
|          |            |                        | MI          | 22.70            | 26.60            | 3.86                  | 17.55                           |
|          |            |                        | MR          | 47.40            | 19.80            | -27.60                | 42.62                           |
|          |            |                        | <b>Mean</b> | <b>37.93</b>     | <b>22.00</b>     | <b>-15.95</b>         | <b>32.63</b>                    |
|          |            | Present to<br>SSP3 7.0 | BC          | 64.80            | 17.60            | -47.20                | 60.30                           |
|          |            |                        | MI          | 27.10            | 26.70            | -0.41                 | 22.38                           |
|          |            |                        | MR          | 42.70            | 21.50            | -21.20                | 38.76                           |
|          |            |                        | <b>Mean</b> | <b>44.87</b>     | <b>21.93</b>     | <b>-22.94</b>         | <b>40.48</b>                    |
|          |            | Present to<br>SSP5 8.5 | BC          | 70.70            | 20.50            | -50.30                | 67.30                           |
|          |            |                        | MI          | 28.10            | 32.50            | 4.36                  | 24.96                           |
|          |            |                        | MR          | 64.70            | 20.40            | -44.30                | 58.00                           |
|          |            |                        | <b>Mean</b> | <b>54.50</b>     | <b>24.47</b>     | <b>-30.08</b>         | <b>50.09</b>                    |
|          | 2090       | Present to<br>SSP1 2.6 | BC          | 26.08            | 16.80            | -9.28                 | 20.16                           |
|          |            |                        | MI          | 25.13            | 27.00            | 1.87                  | 21.82                           |
|          |            |                        | MR          | 44.10            | 16.80            | -27.30                | 39.22                           |
|          |            |                        | <b>Mean</b> | <b>31.77</b>     | <b>20.20</b>     | <b>-11.57</b>         | <b>27.07</b>                    |
|          |            | Present to<br>SSP2 4.5 | BC          | 64.10            | 16.90            | -47.10                | 58.69                           |
|          |            |                        | MI          | 32.02            | 29.10            | -2.90                 | 28.95                           |
|          |            |                        | MR          | 38.30            | 18.70            | -19.60                | 33.34                           |
|          |            |                        | <b>Mean</b> | <b>44.81</b>     | <b>21.57</b>     | <b>-23.20</b>         | <b>40.33</b>                    |
|          |            | Present to<br>SSP3 7.0 | BC          | 86.30            | 16.01            | -70.20                | 82.09                           |
|          |            |                        | MI          | 37.50            | 26.70            | -10.80                | 33.90                           |
|          |            |                        | MR          | 35.10            | 18.70            | -16.30                | 29.71                           |
|          |            |                        | <b>Mean</b> | <b>52.97</b>     | <b>20.47</b>     | <b>-32.43</b>         | <b>48.43</b>                    |
|          |            | Present to<br>SSP5 8.5 | BC          | 91.80            | 14.90            | -76.90                | 86.97                           |
|          |            |                        | MI          | 54.30            | 27.10            | -27.20                | 52.96                           |
|          |            |                        | MR          | 43.90            | 18.50            | -25.40                | 38.17                           |
|          |            |                        | <b>Mean</b> | <b>63.33</b>     | <b>20.17</b>     | <b>-43.17</b>         | <b>59.37</b>                    |

**Table S7.** Mean altitude for present and future projections of *Ophrys insectifera* distribution for the EnvThin ensemble model. For the future, two time slices, 2070 (2061-2080) and 2090 (2081-2100), are presented for all selected GCMs (BC: BCC-CSM2-MR, MI: MIROC-ES2L, MR: MRI-ESM2-0) and two SSPs (SSP2-4.5 and SSP3-7.0).

| Thinning | Timeslice | SSP      | Period/GCM | Mean altitude (m) |
|----------|-----------|----------|------------|-------------------|
| EnvThin  | Present   | SSP2 4.5 | Current    | 542.6             |
|          |           |          | BC         | 465.9             |
|          |           |          | MI         | 473.3             |
|          | 2070      | SSP2 4.5 | MR         | 487.4             |
|          |           |          | BC         | 450.3             |
|          |           |          | MI         | 481.0             |
|          |           | SSP3 7.0 | MR         | 507.8             |
|          |           |          | BC         | 442.4             |
|          |           |          | MI         | 474.6             |
|          | 2090      | SSP2 4.5 | MR         | 500.5             |
|          |           |          | BC         | 387.5             |
|          |           |          | MI         | 478.1             |
|          |           | SSP3 7.0 | MR         | 489.9             |
|          |           |          |            |                   |

**Table S8.** Mean altitude for present and future projections of *Ophrys insectifera* distribution for the GeoThin ensemble model. For the future, two time slices, 2070 (2061-2080) and 2090 (2081-2100), are presented for all selected GCMs (BC: BCC-CSM2-MR, MI: MIROC-ES2L, MR: MRI-ESM2-0) and SSPs (SSP1-2.6, SSP2-4.5, SSP3-7.0 and SSP5-8.5).

| Thinning | Timeslice | SSP      | Period/GCM | Mean altitude (m) |
|----------|-----------|----------|------------|-------------------|
| Geo      | Present   |          | Current    | 504.9             |
|          |           |          | BC         | 432.4             |
|          |           |          | MI         | 456.5             |
|          |           |          | MR         | 276.1             |
|          | 2070*     | SSP2 4.5 | BC         | 374.9             |
|          |           |          | MI         | 432.7             |
|          |           |          | MR         | 358.6             |
|          |           | SSP3 7.0 | BC         | 347.7             |
|          |           |          | MI         | 418.8             |
|          |           |          | MR         | 385.0             |
|          |           | SSP5 8.5 | BC         | 336.3             |
|          |           |          | MI         | 403.6             |
|          |           |          | MR         | 257.1             |
|          | 2090**    | SSP1 2.6 | BC         | 437.1             |
|          |           |          | MI         | 443.9             |
|          |           |          | MR         | 352.6             |
|          |           | SSP2 4.5 | BC         | 324.6             |
|          |           |          | MI         | 401.6             |
|          |           |          | MR         | 360.0             |
|          |           | SSP3 7.0 | BC         | 286.1             |
|          |           |          | MI         | 387.9             |
|          |           |          | MR         | 389.0             |
|          |           | SSP5 8.5 | BC         | 155.5             |
|          |           |          | MI         | 363.3             |
|          |           |          | MR         | 362.6             |

\* Kruskal Wallis test  $\chi^2 = 1581.2$ ,  $df = 6$ ,  $p < 0.001$

\*\* Kruskal Wallis test  $\chi^2 = 998.7$ ,  $df = 6$ ,  $p < 0.001$



**Table S9.** Distance matrices between current and future distribution centroids for the EnvThin ensemble, for all GCMs and SSPs. BC: BCC-CSM2-MR, MI: MIROC-ES2L, MR: MRI-ESM2-0. 26: SSP1-2.6, 45: SSP2-4.5, 70: SSP3-7.0, 85: SSP5-8.5.

| Ensemble | Timeslice | GCM/SSP | Present | BC26  | BC45  | BC70  | BC85  | MI26  | MI45  | MI70  | MI85  | MR26  | MR45  | MR70  | MR85  |
|----------|-----------|---------|---------|-------|-------|-------|-------|-------|-------|-------|-------|-------|-------|-------|-------|
| EnvThin  | 2070      | Present | 0       | 104.0 | 128.0 | 251.4 | 323.5 | 59.6  | 108.2 | 102.1 | 129.7 | 140.5 | 137.4 | 105.2 | 186.6 |
|          |           | BC26    | 104.0   | 0     | 41.4  | 187.3 | 267.2 | 44.6  | 11.1  | 58.5  | 77.0  | 44.2  | 33.4  | 15.4  | 92.7  |
|          |           | BC45    | 128.0   | 41.4  | 0     | 145.9 | 225.8 | 74.4  | 30.4  | 41.3  | 43.9  | 67.5  | 38.0  | 28.5  | 58.5  |
|          |           | BC70    | 251.4   | 187.3 | 145.9 | 0     | 80.5  | 212.8 | 176.2 | 151.4 | 122.9 | 202.7 | 173.1 | 173.6 | 112.4 |
|          |           | BC85    | 323.5   | 267.2 | 225.8 | 80.5  | 0     | 290.1 | 256.1 | 227.1 | 198.9 | 283.1 | 253.6 | 253.1 | 191.6 |
|          |           | MI26    | 59.6    | 44.6  | 74.4  | 212.8 | 290.1 | 0     | 49.9  | 63.6  | 91.2  | 82.3  | 78.0  | 48.0  | 132.0 |
|          |           | MI45    | 108.2   | 11.1  | 30.4  | 176.2 | 256.1 | 49.9  | 0     | 50.1  | 66.6  | 49.3  | 30.8  | 6.2   | 83.6  |
|          |           | MI70    | 102.1   | 58.5  | 41.3  | 151.4 | 227.1 | 63.6  | 50.1  | 0     | 28.5  | 99.0  | 74.4  | 44.1  | 92.3  |
|          |           | MI85    | 129.7   | 77.0  | 43.9  | 122.9 | 198.9 | 91.2  | 66.6  | 28.5  | 0     | 110.8 | 81.9  | 61.6  | 76.6  |
|          |           | MR26    | 140.5   | 44.2  | 67.5  | 202.7 | 283.1 | 82.3  | 49.3  | 99.0  | 110.8 | 0     | 30.8  | 55.5  | 93.8  |
|          |           | MR45    | 137.4   | 33.4  | 38.0  | 173.1 | 253.6 | 78.0  | 30.8  | 74.4  | 81.9  | 30.8  | 0     | 35.9  | 67.4  |
|          |           | MR70    | 105.2   | 15.4  | 28.5  | 173.6 | 253.1 | 48.0  | 6.2   | 44.1  | 61.6  | 55.5  | 35.9  | 0     | 84.3  |
|          |           | MR85    | 186.6   | 92.7  | 58.5  | 112.4 | 191.6 | 132.0 | 83.6  | 92.3  | 76.6  | 93.8  | 67.4  | 84.3  | 0     |
|          | 2090      | Present | 0       | 81.8  | 199.3 | 548.8 | 759.2 | 85.7  | 124.4 | 106.5 | 207.2 | 120.6 | 125.2 | 102.4 | 124.1 |
|          |           | BC26    | 81.8    | 0     | 129.9 | 510.1 | 721.0 | 6.2   | 58.6  | 41.4  | 163.3 | 41.5  | 62.7  | 28.5  | 50.4  |
|          |           | BC45    | 199.3   | 129.9 | 0     | 396.6 | 605.2 | 130.3 | 75.1  | 93.5  | 79.1  | 119.2 | 154.5 | 101.9 | 132.5 |
|          |           | BC70    | 548.8   | 510.1 | 396.6 | 0     | 211.0 | 513.1 | 452.5 | 468.7 | 347.2 | 512.7 | 549.5 | 482.8 | 527.2 |
|          |           | BC85    | 759.2   | 721.0 | 605.2 | 211.0 | 0     | 723.8 | 663.1 | 679.5 | 558.2 | 722.5 | 758.9 | 693.4 | 736.7 |
|          |           | MI26    | 85.7    | 6.2   | 130.3 | 513.1 | 723.8 | 0     | 60.8  | 44.5  | 166.6 | 36.0  | 56.6  | 30.4  | 44.3  |
|          |           | MI45    | 124.4   | 58.6  | 75.1  | 452.5 | 663.1 | 60.8  | 0     | 18.5  | 107.0 | 66.6  | 103.1 | 30.4  | 82.1  |
|          |           | MI70    | 106.5   | 41.4  | 93.5  | 468.7 | 679.5 | 44.5  | 18.5  | 0     | 122.0 | 58.5  | 92.7  | 15.4  | 73.3  |
|          |           | MI85    | 207.2   | 163.3 | 79.1  | 347.2 | 558.2 | 166.6 | 107.0 | 122.0 | 0     | 171.6 | 208.7 | 136.6 | 186.9 |
|          |           | MR26    | 120.6   | 41.5  | 119.2 | 512.7 | 722.5 | 36.0  | 66.6  | 58.5  | 171.6 | 0     | 37.2  | 44.2  | 15.4  |
|          |           | MR45    | 125.2   | 62.7  | 154.5 | 549.5 | 758.9 | 56.6  | 103.1 | 92.7  | 208.7 | 37.2  | 0     | 77.5  | 22.3  |
|          |           | MR70    | 102.4   | 28.5  | 101.9 | 482.8 | 693.4 | 30.4  | 30.4  | 15.4  | 136.6 | 44.2  | 77.5  | 0     | 58.6  |
|          |           | MR85    | 124.1   | 50.4  | 132.5 | 527.2 | 736.7 | 44.3  | 82.1  | 73.3  | 186.9 | 15.4  | 22.3  | 58.6  | 0     |

**Table S10.** Distance matrices between current and future distribution centroids for the GeoThin ensemble, for all GCMs and SSPs. BC: BCC-CSM2-MR, MI: MIROC-ES2L, MR: MRI-ESM2-0. 26: SSP1-2.6, 45: SSP2-4.5, 70: SSP3-7.0, 85: SSP5-8.5.

| Ensemble | Time-slice | GCM/SSP | Present | BC26  | BC45  | BC70  | BC85  | MI26  | MI45  | MI70  | MI85  | MR26  | MR45  | MR70  | MR85  |
|----------|------------|---------|---------|-------|-------|-------|-------|-------|-------|-------|-------|-------|-------|-------|-------|
| GeoThin  | 2070       | Present | 0       | 83.6  | 156.1 | 259.2 | 305.8 | 79.0  | 94.4  | 102.4 | 124.5 | 289.3 | 189.4 | 171.6 | 329.7 |
|          |            | BC26    | 83.6    | 0     | 74.7  | 194.7 | 258.2 | 6.2   | 11.2  | 41.5  | 55.9  | 205.8 | 110.7 | 102.1 | 247.3 |
|          |            | BC45    | 156.1   | 74.7  | 0     | 133.3 | 210.5 | 78.0  | 63.6  | 62.0  | 44.0  | 138.3 | 37.6  | 48.1  | 173.6 |
|          |            | BC70    | 259.2   | 194.7 | 133.3 | 0     | 88.3  | 195.0 | 185.3 | 159.4 | 139.5 | 164.3 | 99.5  | 92.7  | 144.0 |
|          |            | BC85    | 305.8   | 258.2 | 210.5 | 88.3  | 0     | 256.8 | 250.9 | 217.9 | 202.9 | 250.1 | 181.9 | 163.7 | 219.1 |
|          |            | MI26    | 79.0    | 6.2   | 78.0  | 195.0 | 256.8 | 0     | 15.5  | 39.1  | 55.6  | 210.6 | 113.2 | 102.7 | 251.2 |
|          |            | MI45    | 94.4    | 11.2  | 63.6  | 185.3 | 250.9 | 15.5  | 0     | 37.2  | 48.0  | 195.1 | 99.8  | 92.7  | 236.2 |
|          |            | MI70    | 102.4   | 41.5  | 62.0  | 159.4 | 217.9 | 39.1  | 37.2  | 0     | 22.3  | 200.3 | 89.3  | 69.4  | 232.1 |
|          |            | MI85    | 124.5   | 55.9  | 44.0  | 139.5 | 202.9 | 55.6  | 48.0  | 22.3  | 0     | 180.9 | 67.5  | 47.9  | 210.4 |
|          |            | MR26    | 289.3   | 205.8 | 138.3 | 164.3 | 250.1 | 210.6 | 195.1 | 200.3 | 180.9 | 0     | 119.0 | 154.7 | 65.2  |
|          |            | MR45    | 189.4   | 110.7 | 37.6  | 99.5  | 181.9 | 113.2 | 99.8  | 89.3  | 67.5  | 119.0 | 0     | 36.6  | 143.0 |
|          |            | MR70    | 171.6   | 102.1 | 48.1  | 92.7  | 163.7 | 102.7 | 92.7  | 69.4  | 47.9  | 154.7 | 36.6  | 0     | 172.3 |
|          |            | MR85    | 329.7   | 247.3 | 173.6 | 144.0 | 219.1 | 251.2 | 236.2 | 232.1 | 210.4 | 65.2  | 143.0 | 172.3 | 0     |
|          | 2090       | Present | 0       | 74.7  | 273.9 | 451.4 | 559.9 | 99.1  | 148.5 | 170.7 | 223.8 | 171.2 | 185.9 | 141.2 | 201.3 |
|          |            | BC26    | 74.7    | 0     | 199.9 | 426.6 | 526.6 | 26.5  | 74.7  | 96.9  | 168.6 | 96.5  | 115.0 | 66.8  | 130.0 |
|          |            | BC45    | 273.9   | 199.9 | 0     | 390.5 | 452.8 | 179.3 | 125.4 | 103.2 | 132.7 | 104.7 | 120.6 | 133.1 | 111.4 |
|          |            | BC70    | 451.4   | 426.6 | 390.5 | 0     | 120.7 | 433.1 | 397.8 | 393.0 | 282.7 | 408.2 | 458.5 | 404.7 | 461.2 |
|          |            | BC85    | 559.9   | 526.6 | 452.8 | 120.7 | 0     | 529.2 | 487.0 | 478.0 | 368.3 | 492.6 | 540.2 | 494.9 | 540.1 |
|          |            | MI26    | 99.1    | 26.5  | 179.3 | 433.1 | 529.2 | 0     | 57.0  | 78.1  | 165.0 | 74.7  | 88.5  | 48.0  | 103.6 |
|          |            | MI45    | 148.5   | 74.7  | 125.4 | 397.8 | 487.0 | 57.0  | 0     | 22.2  | 118.7 | 26.2  | 70.2  | 9.3   | 80.5  |
|          |            | MI70    | 170.7   | 96.9  | 103.2 | 393.0 | 478.0 | 78.1  | 22.2  | 0     | 110.8 | 15.4  | 66.6  | 30.4  | 73.0  |
|          |            | MI85    | 223.8   | 168.6 | 132.7 | 282.7 | 368.3 | 165.0 | 118.7 | 110.8 | 0     | 125.9 | 175.8 | 126.8 | 178.9 |
|          |            | MR26    | 171.2   | 96.5  | 104.7 | 408.2 | 492.6 | 74.7  | 26.2  | 15.4  | 125.9 | 0     | 51.2  | 30.8  | 58.3  |
|          |            | MR45    | 185.9   | 115.0 | 120.6 | 458.5 | 540.2 | 88.5  | 70.2  | 66.6  | 175.8 | 51.2  | 0     | 68.4  | 15.4  |
|          |            | MR70    | 141.2   | 66.8  | 133.1 | 404.7 | 494.9 | 48.0  | 9.3   | 30.4  | 126.8 | 30.8  | 68.4  | 0     | 80.0  |
|          |            | MR85    | 201.3   | 130.0 | 111.4 | 461.2 | 540.1 | 103.6 | 80.5  | 73.0  | 178.9 | 58.3  | 15.4  | 80.0  | 0     |
